# Supplementary material for: The regulatory network of E. coli metabolism as a Boolean dynamical system exhibits both homeostasis and flexibility of response
Source: PubMed Central journal article supplement (PMC2322946; doi:10.1186/1752-0509-2-21), 2008-02-29
Supplement: 1752-0509-2-21-S1.pdf [file 1752-0509-2-21-S1.pdf]

## Additional File 1: Supplementary Tables

**Table S1:** List of minimal media considered as environmental conditions to study *E. coli* TRN. The 62 minimal media listed here are considered in aerobic conditions. The first 31 media shaded in grey are considered also in anaerobic conditions. Each carbon source is provided along with ammonia, sulphate, phosphate, proton, iron, potassium and sodium for uptake. Oxygen is provided in aerobic conditions. See supporting text (section on Treatment of external metabolites **m**) for a discussion on how this list was compiled.

| Serial number | Carobn Source                  | Abbreviation of the carbon source |
|---------------|--------------------------------|-----------------------------------|
| 1             | 2-Dehydro-3-deoxy-D-gluconate  | 2ddgln                            |
| 2             | N-acetyl-D-glucosamine         | acgam                             |
| 3             | L-Arabinose                    | arab-L                            |
| 4             | Cytidine                       | cytd                              |
| 5             | D-Fructose                     | fru                               |
| 6             | L-Fucose                       | fuc-L                             |
| 7             | D-Glucose 6-phosphate          | g6p                               |
| 8             | D-Galactose                    | gal                               |
| 9             | D-Galactarate                  | galct-D                           |
| 10            | D-Galactonate                  | galctn-D                          |
| 11            | Galactitol                     | galt                              |
| 12            | D-Glucosamine                  | gam                               |
| 13            | D-Glucose                      | glc-D                             |
| 14            | D-Gluconate                    | gln                               |
| 15            | D-Glucarate                    | glcr                              |
| 16            | L-idonate                      | idon-L                            |
| 17            | Inosine                        | ins                               |
| 18            | Lactose                        | lcts                              |
| 19            | Maltose                        | malt                              |
| 20            | Maltohexaose                   | malthx                            |
| 21            | Maltopentaose                  | maltpt                            |
| 22            | Maltotriose                    | maltr                             |
| 23            | Maltotetraose                  | maltrr                            |
| 24            | D-Mannose                      | man                               |
| 25            | Melibiose                      | melib                             |
| 26            | D-Ribose                       | rib-D                             |
| 27            | L-Rhamnose                     | rmn                               |
| 28            | D-Sorbitol                     | sbt-D                             |
| 29            | Trehalose                      | tre                               |
| 30            | Xanthosine                     | xtsn                              |
| 31            | D-Xylose                       | xyl-D                             |
| 32            | 3-(3-hydroxy-phenyl)propionate | 3hpppn                            |
| 33            | Acetate                        | ac                                |
| 34            | Acetoacetate                   | acac                              |
| 35            | D-Alanine                      | ala-D                             |
| 36            | L-Alanine                      | ala-L                             |
| 37            | L-Arginine                     | arg-L                             |
| 38            | L-Asparagine                   | asn-L                             |
| 39            | L-Asparate                     | asp-L                             |
| 40            | Citrate                        | cit                               |
| 41            | Fumarate                       | fum                               |
| 42            | L-Glutamine                    | gln-L                             |
| 43            | L-Glutamate                    | glu-L                             |
| 44            | Glycine                        | gly                               |
| 45            | Glycerol                       | glyc                              |
| 46            | Glycolate                      | glyclt                            |
| 47            | Hexadecanoate (n-C16:0)        | hdca                              |

|    |                          |         |
|----|--------------------------|---------|
| 48 | D-Lactate                | lac-D   |
| 49 | L-Lactate                | lac-L   |
| 50 | L-Malate                 | mal-L   |
| 51 | D-Mannitol               | mnl     |
| 52 | Octadecanoate (n-C18:0)  | ocdca   |
| 53 | Phenylpropanoate         | pppn    |
| 54 | L-Proline                | pro-L   |
| 55 | Pyruvate                 | pyr     |
| 56 | D-Serine                 | ser-D   |
| 57 | L-Serine                 | ser-L   |
| 58 | Succinate                | succ    |
| 59 | L-tartrate               | tartr-L |
| 60 | L-Threonine              | thr-L   |
| 61 | L-Tryptophan             | trp-L   |
| 62 | Tetradecanoate (n-C14:0) | tdca    |

**Table S2:** List of 21 genes whose configuration can oscillate

| <b>Gene</b> | <b>bnumber</b> |
|-------------|----------------|
| nagC        | b0676          |
| nagA        | b0677          |
| nagB        | b0678          |
| nagE        | b0679          |
| deoR        | b0840          |
| uxaB        | b1521          |
| kdgR        | b1827          |
| uxaA        | b3091          |
| uxaC        | b3092          |
| exuT        | b3093          |
| exuR        | b3094          |
| kdgK        | b3526          |
| glmU        | b3730          |
| kdgT        | b3909          |
| uxuA        | b4322          |
| uxuB        | b4323          |
| uxuR        | b4324          |
| deoC        | b4381          |
| deoA        | b4382          |
| deoB        | b4383          |
| deoD        | b4384          |

**Table S3:** Comparison of growth rate obtained using pure (unconstrained) FBA with that obtained using constrained FBA for various minimal media (see main text, methods section). For each media, the amount of carbon source uptake was set to 10 mM per g-DCW per hr and the uptake rates of all other inorganics in the media was left unconstrained.

| Serial Number | Minimal Media | Oxygen Availability | Growth Rate with regulatory constraints (GRreg) | Growth Rate with no regulatory constraints (GRpure) | Ratio (GRreg/GRpure) |
|---------------|---------------|---------------------|-------------------------------------------------|-----------------------------------------------------|----------------------|
| 1             | ac            | aerobic             | 0.234                                           | 0.234                                               | 0.998                |
| 2             | ala-D         | aerobic             | 0.416                                           | 0.423                                               | 0.985                |
| 3             | ala-L         | aerobic             | 0.416                                           | 0.423                                               | 0.985                |
| 4             | arab-L        | anaerobic           | 0.785                                           | 0.786                                               | 0.998                |
| 5             | arab-L        | aerobic             | 0.220                                           | 0.222                                               | 0.992                |
| 6             | arg-L         | aerobic             | 0.743                                           | 0.784                                               | 0.948                |
| 7             | asn-L         | aerobic             | 0.452                                           | 0.452                                               | 0.999                |
| 8             | asp-L         | aerobic             | 0.451                                           | 0.451                                               | 0.998                |
| 9             | cytd          | anaerobic           | 0.826                                           | 0.872                                               | 0.948                |
| 10            | cytd          | aerobic             | 0.282                                           | 0.394                                               | 0.716                |
| 11            | ddgln         | anaerobic           | 0.830                                           | 0.831                                               | 0.998                |
| 12            | ddgln         | aerobic             | 0.226                                           | 0.228                                               | 0.993                |
| 13            | fru           | anaerobic           | 0.955                                           | 0.957                                               | 0.998                |
| 14            | fru           | aerobic             | 0.297                                           | 0.299                                               | 0.992                |
| 15            | fuc-L         | aerobic             | 0.526                                           | 0.915                                               | 0.575                |
| 16            | fuc-L         | anaerobic           | 0.156                                           | 0.158                                               | 0.993                |
| 17            | fum           | aerobic             | 0.439                                           | 0.439                                               | 0.998                |
| 18            | g6p           | anaerobic           | 0.990                                           | 0.992                                               | 0.998                |
| 19            | g6p           | aerobic             | 0.377                                           | 0.380                                               | 0.992                |
| 20            | gal           | anaerobic           | 0.944                                           | 0.946                                               | 0.998                |
| 21            | gal           | aerobic             | 0.270                                           | 0.272                                               | 0.992                |
| 22            | galct-D       | anaerobic           | 0.663                                           | 0.664                                               | 0.998                |
| 23            | galct-D       | aerobic             | 0.209                                           | 0.210                                               | 0.993                |
| 24            | galctn-D      | anaerobic           | 0.830                                           | 0.831                                               | 0.998                |
| 25            | galctn-D      | aerobic             | 0.226                                           | 0.228                                               | 0.993                |
| 26            | galt          | anaerobic           | 1.007                                           | 1.009                                               | 0.998                |
| 27            | galt          | aerobic             | 0.253                                           | 0.255                                               | 0.993                |
| 28            | gam           | anaerobic           | 0.955                                           | 0.957                                               | 0.998                |
| 29            | gam           | aerobic             | 0.297                                           | 0.299                                               | 0.992                |
| 30            | glc-D         | anaerobic           | 0.955                                           | 0.957                                               | 0.998                |
| 31            | glc-D         | aerobic             | 0.297                                           | 0.299                                               | 0.992                |
| 32            | glcn          | anaerobic           | 0.876                                           | 0.877                                               | 0.998                |
| 33            | glcn          | aerobic             | 0.241                                           | 0.243                                               | 0.990                |
| 34            | glcr          | anaerobic           | 0.663                                           | 0.664                                               | 0.998                |
| 35            | glcr          | aerobic             | 0.209                                           | 0.210                                               | 0.993                |
| 36            | gln-L         | aerobic             | 0.644                                           | 0.644                                               | 0.999                |
| 37            | glu-L         | aerobic             | 0.670                                           | 0.674                                               | 0.994                |
| 38            | glyc          | aerobic             | 0.555                                           | 0.555                                               | 0.998                |
| 39            | glyclt        | aerobic             | 0.177                                           | 0.177                                               | 0.998                |
| 40            | hpppn         | aerobic             | 1.124                                           | 1.125                                               | 0.999                |
| 41            | idon-L        | anaerobic           | 0.866                                           | 0.867                                               | 0.998                |
| 42            | idon-L        | aerobic             | 0.207                                           | 0.208                                               | 0.992                |
| 43            | ins           | anaerobic           | 0.888                                           | 0.889                                               | 0.998                |
| 44            | ins           | aerobic             | 0.350                                           | 0.352                                               | 0.995                |
| 45            | lac-D         | aerobic             | 0.410                                           | 0.413                                               | 0.992                |
| 46            | lac-L         | aerobic             | 0.372                                           | 0.375                                               | 0.992                |

|    |         |           |       |       |       |
|----|---------|-----------|-------|-------|-------|
| 47 | lcts    | anaerobic | 1.900 | 1.903 | 0.998 |
| 48 | lcts    | aerobic   | 0.566 | 0.571 | 0.992 |
| 49 | mal-L   | aerobic   | 0.427 | 0.439 | 0.971 |
| 50 | malt    | anaerobic | 1.911 | 1.914 | 0.998 |
| 51 | malt    | aerobic   | 0.593 | 0.598 | 0.992 |
| 52 | malthx  | anaerobic | 5.826 | 5.835 | 0.998 |
| 53 | malthx  | aerobic   | 1.995 | 2.010 | 0.992 |
| 54 | maltpt  | anaerobic | 4.824 | 4.832 | 0.998 |
| 55 | maltpt  | aerobic   | 1.591 | 1.603 | 0.992 |
| 56 | malttr  | anaerobic | 2.867 | 2.871 | 0.998 |
| 57 | malttr  | aerobic   | 0.890 | 0.897 | 0.992 |
| 58 | maltttr | anaerobic | 3.822 | 3.828 | 0.998 |
| 59 | maltttr | aerobic   | 1.186 | 1.195 | 0.992 |
| 60 | man     | anaerobic | 0.955 | 0.957 | 0.998 |
| 61 | man     | aerobic   | 0.297 | 0.299 | 0.992 |
| 62 | melib   | anaerobic | 1.900 | 1.903 | 0.998 |
| 63 | melib   | aerobic   | 0.566 | 0.571 | 0.992 |
| 64 | mnl     | aerobic   | 1.020 | 1.025 | 0.995 |
| 65 | pro-L   | aerobic   | 0.754 | 0.762 | 0.990 |
| 66 | pyr     | aerobic   | 0.346 | 0.348 | 0.992 |
| 67 | rib-D   | anaerobic | 0.750 | 0.751 | 0.998 |
| 68 | rib-D   | aerobic   | 0.139 | 0.140 | 0.992 |
| 69 | rmn     | aerobic   | 0.526 | 0.915 | 0.575 |
| 70 | rmn     | anaerobic | 0.156 | 0.158 | 0.993 |
| 71 | sbt-D   | anaerobic | 1.020 | 1.025 | 0.995 |
| 72 | sbt-D   | aerobic   | 0.256 | 0.258 | 0.992 |
| 73 | ser-D   | aerobic   | 0.346 | 0.348 | 0.992 |
| 74 | ser-L   | aerobic   | 0.354 | 0.356 | 0.994 |
| 75 | succ    | aerobic   | 0.469 | 0.469 | 0.998 |
| 76 | tre     | anaerobic | 1.911 | 1.914 | 0.998 |
| 77 | tre     | aerobic   | 0.593 | 0.598 | 0.992 |
| 78 | xtsn    | anaerobic | 0.857 | 0.859 | 0.998 |
| 79 | xtsn    | aerobic   | 0.346 | 0.348 | 0.995 |
| 80 | xyl-D   | anaerobic | 0.785 | 0.786 | 0.998 |
| 81 | xyl-D   | aerobic   | 0.220 | 0.222 | 0.992 |

**Table S4:** Abbreviations used to label nodes corresponding to conditions and stimuli in Fig. 4 and their corresponding names

| <b>Abbreviation</b> | <b>Name</b>      |
|---------------------|------------------|
| C1                  | CRP noGLC        |
| C2                  | Surplus FDP      |
| C3                  | Surplus PYR      |
| C4                  | NRI_low          |
| C5                  | NRI_hi           |
| C6                  | Growth           |
| C7                  | pH               |
| S1                  | Dipyridyl        |
| S2                  | High NAD         |
| S3                  | Heat shock       |
| S4                  | Stress           |
| S5                  | Oxidative stress |
| S6                  | LBMedia          |
| S7                  | High osmolarity  |
| S8                  | Salicylate       |

**Table S5:** The table shows the number of genes in *E. coli* TRN with K regulatory inputs

| <b>Number of regulatory inputs<br/>K</b> | <b>Number of Genes</b> |
|------------------------------------------|------------------------|
| 1                                        | 259                    |
| 2                                        | 189                    |
| 3                                        | 68                     |
| 4                                        | 39                     |
| 5                                        | 10                     |
| 6                                        | 4                      |
| 8                                        | 2                      |
